**Table S1. Links to various videos on YouTube that supplement some of the verbal descriptions of laser-enhanced smoke-visualization experiments**

| Title                                                                       | Link                                                                  | Description                                                                                                                                                                                                                                                                    |
|-----------------------------------------------------------------------------|-----------------------------------------------------------------------|--------------------------------------------------------------------------------------------------------------------------------------------------------------------------------------------------------------------------------------------------------------------------------|
| <i>Trachylepis capensis</i> burrow clearance                                | <a href="http://youtu.be/opvtgs8X1cY">http://youtu.be/opvtgs8X1cY</a> | Depicts the various configurations of the laser-enhanced smoke visualization experiments described in the text.                                                                                                                                                                |
| Eddy penetration as a mechanism for burrow gas exchange                     | <a href="http://youtu.be/VWq64IzCO6I">http://youtu.be/VWq64IzCO6I</a> | Penetration of turbulent eddies into a vertical glass tube, showing the episodic nature of eddy penetration as a means of powering air turnover in a single opening vertical burrow                                                                                            |
| Using lasers to visualize boundary layer flows near animal burrow entrances | <a href="http://youtu.be/-Cisabm7vck">http://youtu.be/-Cisabm7vck</a> | Depicts the ways that multicolored lasers can be used to describe the complex turbulent flows in the surface boundary layer, near the opening of the complex nest of the ant <i>Pheidole</i> spp. Details of such methods as color separation, smoke injection, and clearance. |
